# Supplementary material
Source: PubMed Central journal article supplement (PMC5546250)
Supplement: NIHMS883931-supplement.pdf [file NIHMS883931-supplement.pdf]

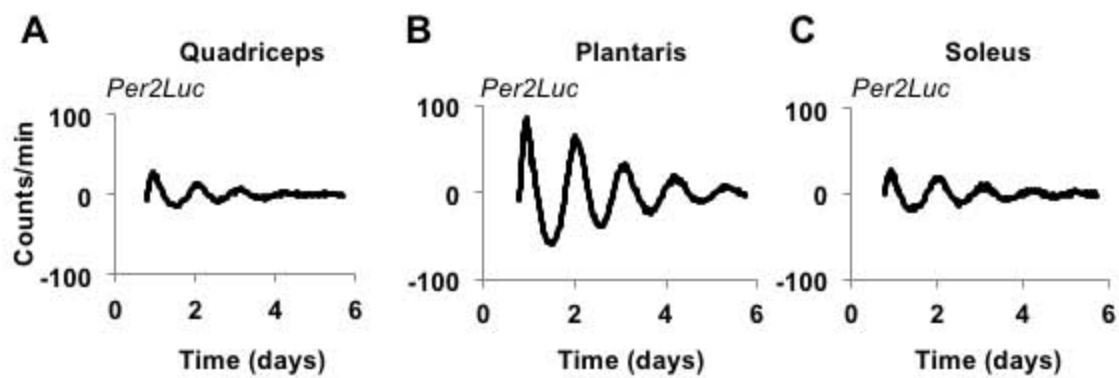

**Figure S1. Circadian rhythms in muscle explants. Related to Figure 1.**

Continuous recording of luminescence from explants of quadriceps, plantaris or soleus muscles isolated from *PER2::LUC* transgenic mice.

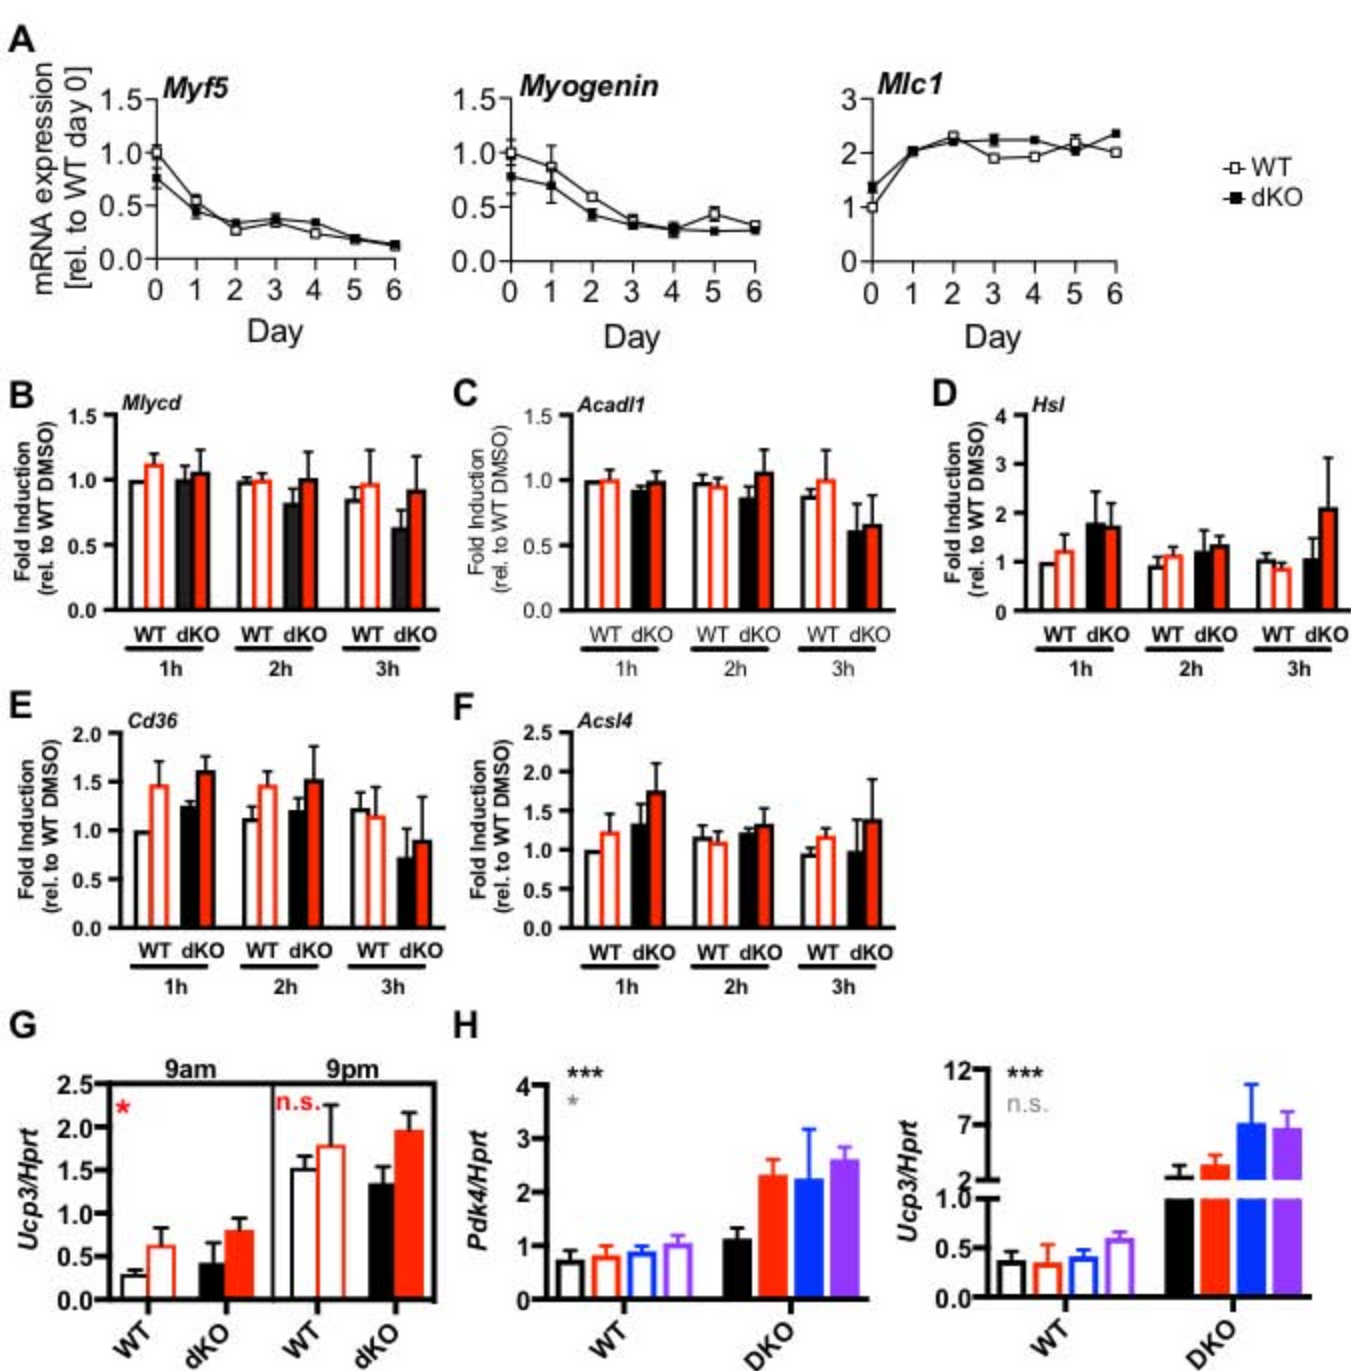

**Figure S2. Gene expression in primary myotubes. Related to Figure 3.**

Relative mRNA expression of the indicated genes in WT (open symbols) or dKO (closed symbols) in primary muscle cells at the indicated times during differentiation (A), at the indicated times following treatment with vehicle (DMSO, black) or GW1516 (red) (B-F), or after treatment with vehicle (black), AICAR (daily for 3 days at 9am, red), GW1516 (3 hrs, blue) or AICAR + GW1516 (purple) (G,H). Data represent the mean  $\pm$  s.e.m of two or three biological replicates, each measured in triplicate. In (G) data were analyzed by 3-way ANOVA for effects of genotype (n.s.), treatment (red symbols) or time of day ( $P < 0.05$ ). In (H) data were analyzed by 2-way ANOVA for effects of genotype (black symbols) or treatment (gray symbols) \*  $P < 0.05$ , \*\*\*  $P < 0.001$ .

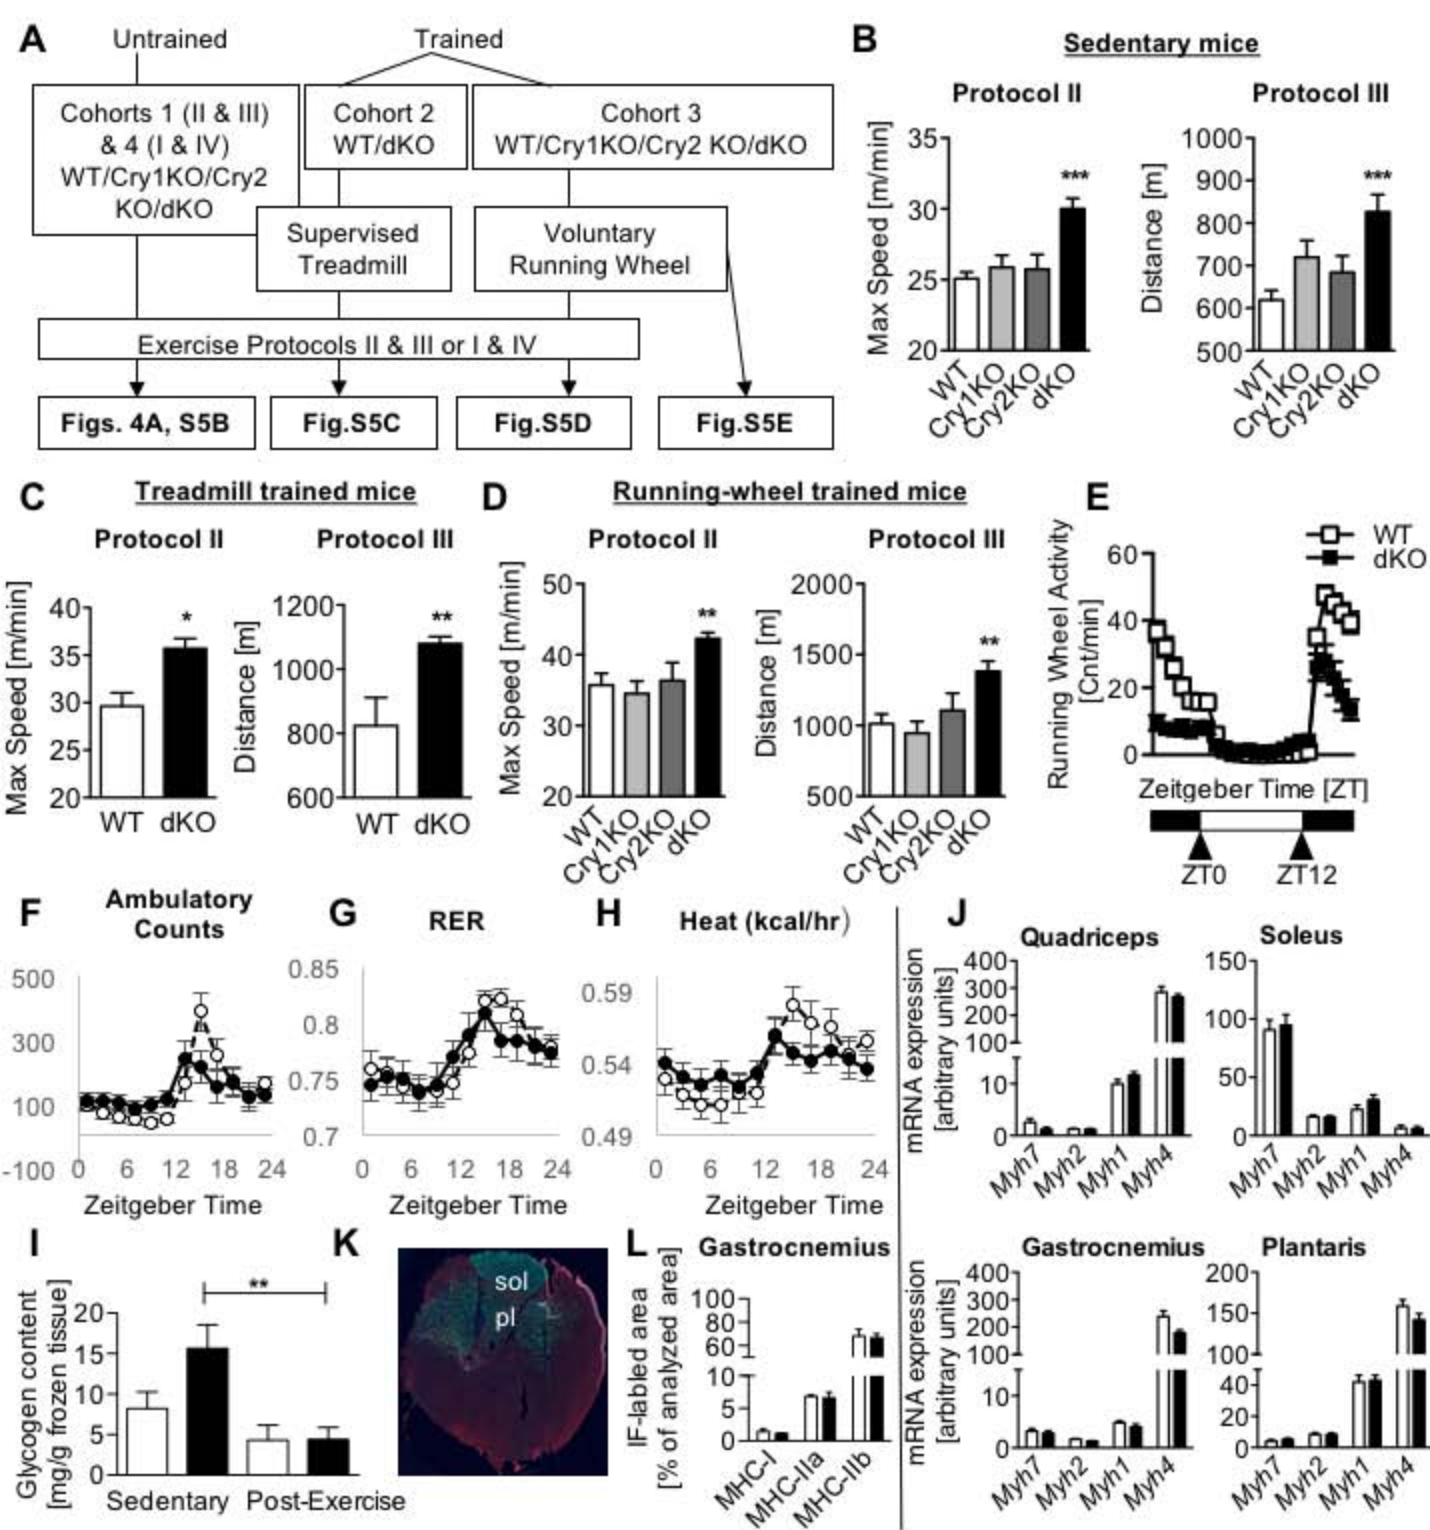

**Figure S3. Metabolic analyses of Cry-deficient mice. Related to Figure 4.**

(A) Chart depicting experimental setups used to obtain data in the indicated figures. (B-D) Maximum speed (protocol II) and distance (protocol III) achieved by sedentary (B), treadmill trained (C) or running-wheel trained (D) male mice. N=7-35. (E) Spontaneous activity measured over 8 days and averaged in 1-hour intervals. N=12-24 animals per genotype. (F-H) Ambulatory movement (F) respiratory exchange ratio (G, RER), and heat production (H) in male littermate mice. Primary data reported in (Lamia et al., 2011). N=6 per genotype. (I) Glycogen content in liver measured in samples isolated from male mice without (Sedentary) or 5 minutes after one hour of intense running on a treadmill (Post-Exercise). (J) mRNA expression of the indicated genes. N=7-8 samples per genotype. (K) Representative immunofluorescence slide scan image of gastrocnemius, plantaris (pl) and soleus (sol) muscles stained for MHCs I (blue), IIa (green) and IIb (red). (L) Semi-automated quantification of images like (K) In all figures, white and black symbols represent WT and dKO respectively. Data represent the mean  $\pm$  s.e.m. \*, \*\*, \*\*\* P < 0.05, 0.01, 0.001.

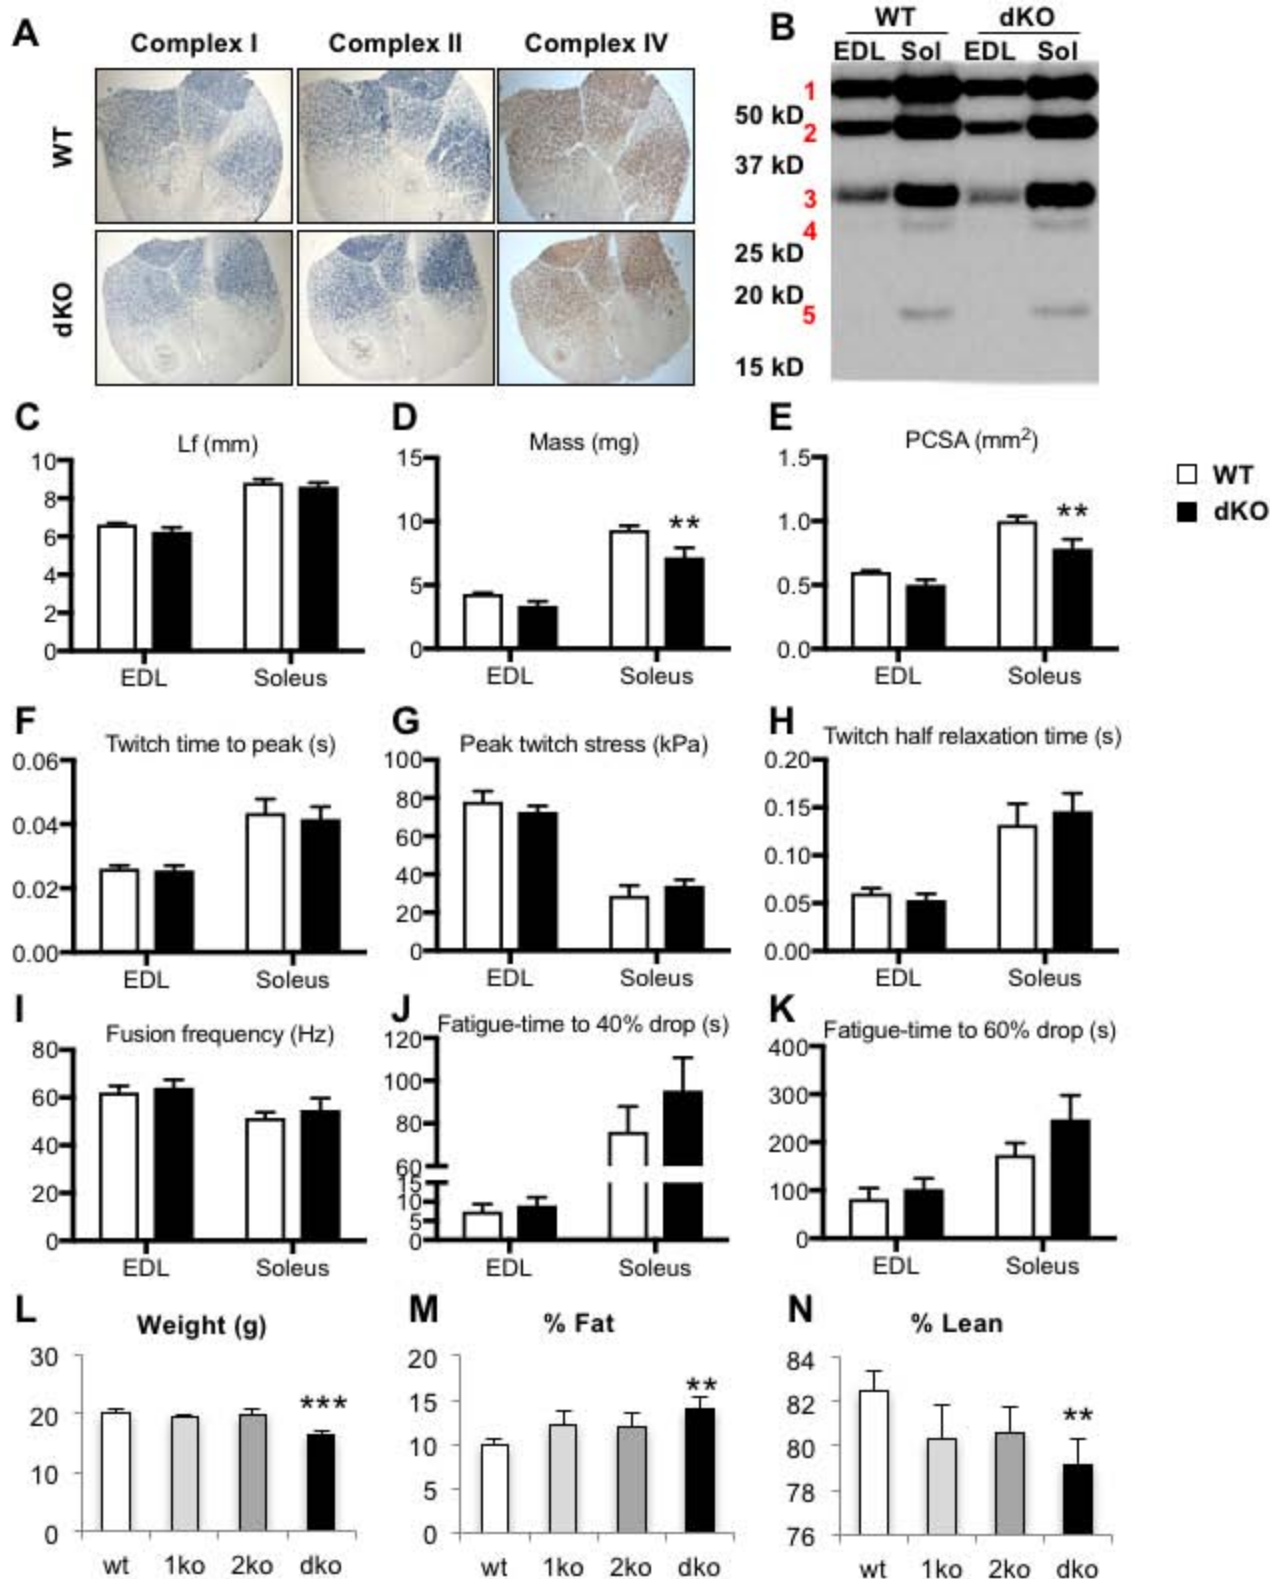

**Figure S4. Metabolic analyses of *Cry*-deficient mice. Related to Figure 4.**

(A) Representative images of enzyme activity of mitochondrial respiratory chain complexes in gastrocnemius, plantaris and soleus muscle in WT and dKO mice. (B) Representative Immunoblot of mitochondrial OXPHOS complex composition in extensor digitorum longus (EDL) and soleus of WT and dKO mice. 1 = C-V- $\alpha$  (53 kD), 2 = C-III-Core 2 (47 kD), 3 = C-IV-I (39 kD), 4 = C-II-30 [FeS] (30 kD), 5 = C-I-20 [ND6] (20 kD). (C-K) Extensor digitorum longus (EDL) and soleus muscle fibers isolated from wildtype and *Cry1*<sup>-/-</sup>;*Cry2*<sup>-/-</sup> littermate animals (N=5 per genotype) were subjected to the indicated analyses. \*\*  $P < 0.01$  vs. wildtype by 2-way ANOVA. (L-N) Body weight (L) and body composition (fat, M and lean, N) measured by EchoMRI. N=8-12 animals per genotype. \*\* $P < 0.01$ , \*\*\* $P < 0.001$  vs. WT.

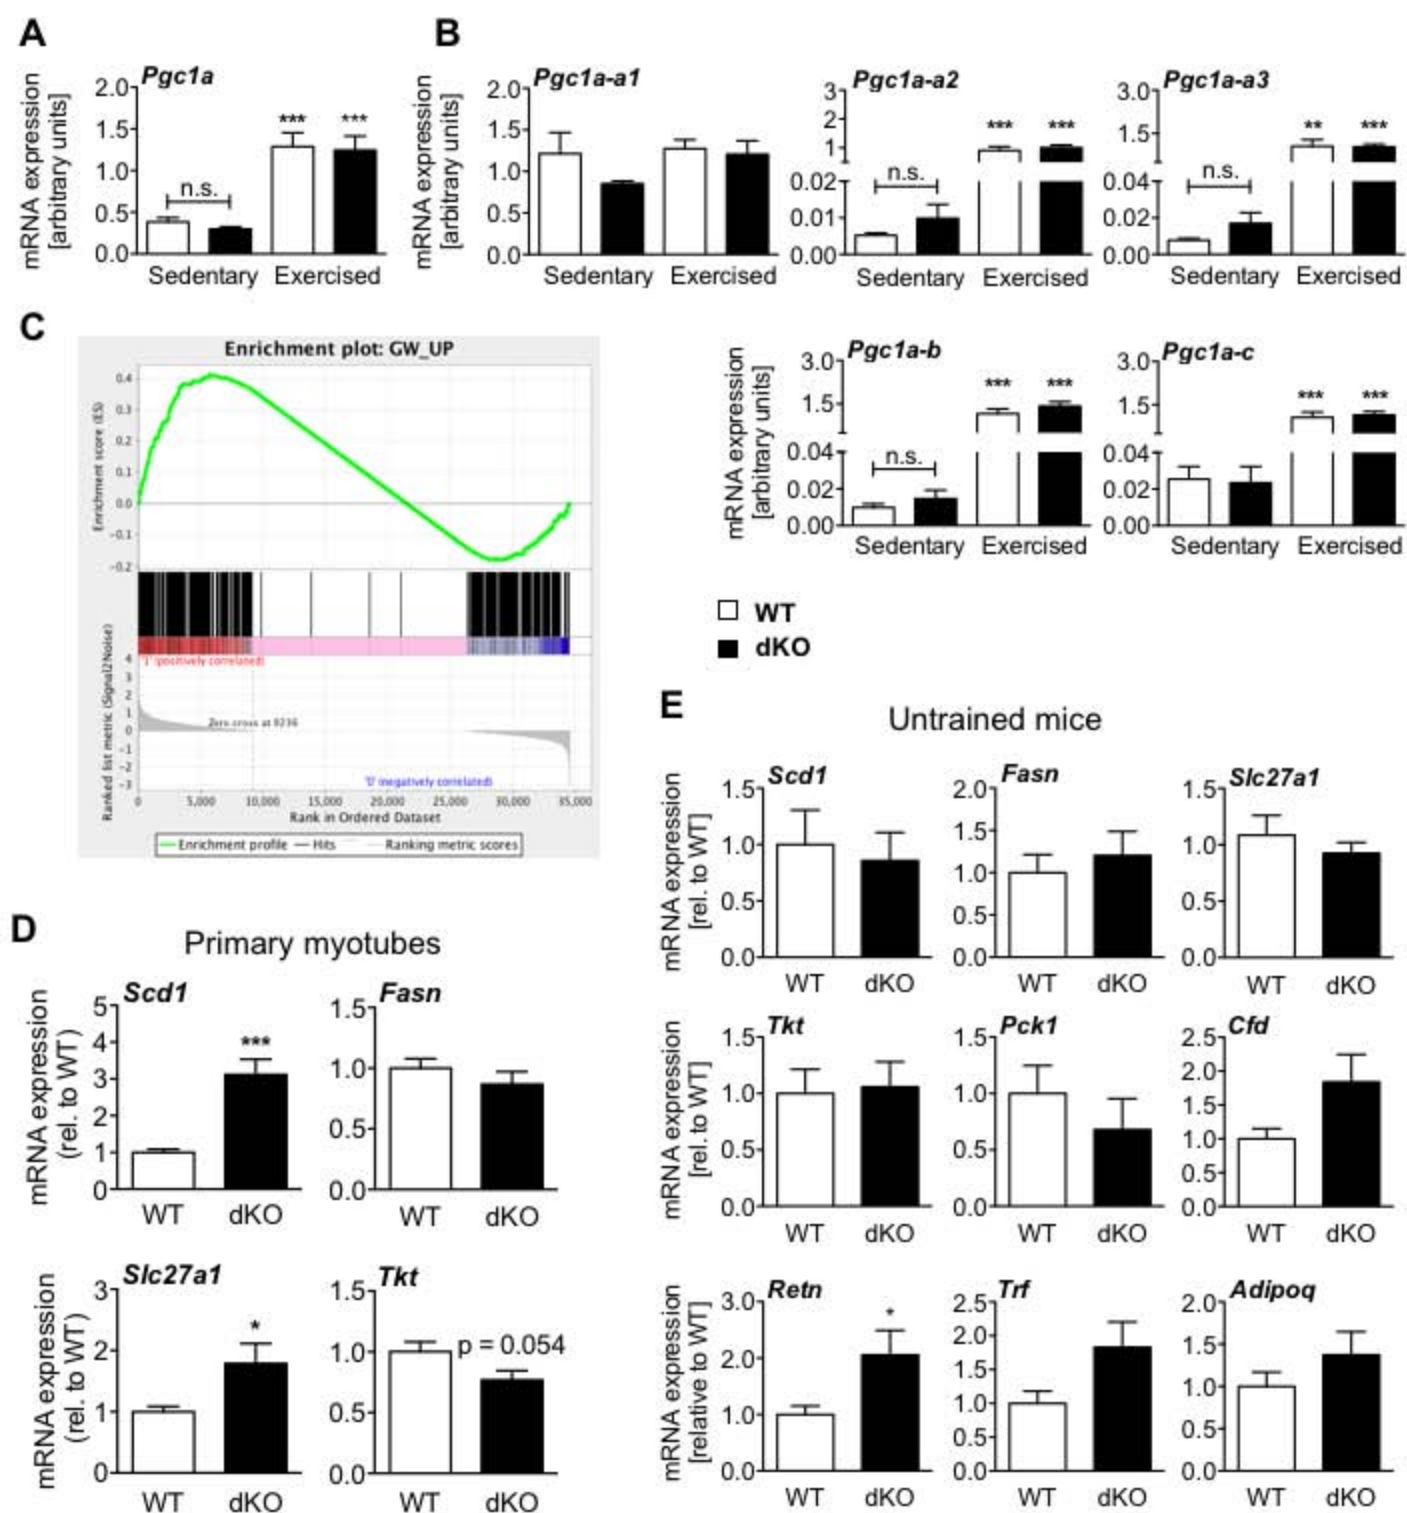

**Figure S5. Gene expression in muscle groups in response to exercise *in vivo*. Related to Figure 5.**  
 (A,B) Relative total *Pgc1a* mRNA expression (A) or of the indicated *Pgc1a* transcripts (B) in quadriceps of untrained mice 30 minutes after one hour of either rest (sedentary) or intensive treadmill exercise (exercised). N=7-8 mice per genotype. n.s. not significant, n.s. not significant, \*\* $p < 0.01$  \*\*\* $p < 0.001$  vs sedentary control or as indicated.  
 (C) Enrichment plot showing the relative position of each transcript in the gene set within the list of all transcripts detected ranked according to their relative expression change between genotypes. Red – increased expression, blue – decreased expression in Cry dKO compared to WT. (D) Relative mRNA expression of the indicated genes in fully differentiated WT (white) or dKO (black) myotubes. Data represent the mean  $\pm$  s.e.m of three independent experiments each done in triplicates. \* $p < 0.05$ , \*\*\*  $p < 0.001$  vs. WT. (E) Relative mRNA expression of the indicated genes in quadriceps of untrained WT (white) and dKO (black) mice. Data represent the mean  $\pm$  s.e.m of 7-8 mice per genotype. \* $p < 0.05$  vs WT.

**Table S1 Gene Set Enrichment Analysis Overrepresented Pathways. Related to Figure 5.**

|                                                                                                                           |            |
|---------------------------------------------------------------------------------------------------------------------------|------------|
| <i>Upregulated in Sedentary DKO v. Sedentary WT:</i>                                                                      | <b>FDR</b> |
| KEGG_PATHOGENIC_ESCHERICHIA_COLI_INFECTION                                                                                | 0.04       |
| KEGG_CELL_ADHESION_MOLECULES_CAMS                                                                                         | 0.20       |
| KEGG_GAP_JUNCTION                                                                                                         | 0.24       |
|                                                                                                                           |            |
| <i>Downregulated in Sedentary DKO v. Sedentary WT: (enriched in WT)</i>                                                   | <b>FDR</b> |
| RICKMAN_HEAD_AND_NECK_CANCER_F                                                                                            | 0.05       |
| WANG_NFKB_TARGETS                                                                                                         | 0.05       |
| REACTOME_STRIATED_MUSCLE_CONTRACTION                                                                                      | 0.05       |
| CHEMELLO_SOLEUS_VS_EDL_MYOFIBERS_UP                                                                                       | 0.05       |
| KEGG_CARDIAC_MUSCLE_CONTRACTION                                                                                           | 0.05       |
| KEGG_DILATED_CARDIOMYOPATHY                                                                                               | 0.07       |
| REACTOME_BRANCHED_CHAIN_AMINO_ACID_CATABOLISM                                                                             | 0.08       |
| REACTOME_PYRUVATE_METABOLISM_AND_CITRIC_ACID_TCA_CYCLE                                                                    | 0.09       |
| KEGG_CITRATE_CYCLE_TCA_CYCLE                                                                                              | 0.09       |
| KAAB_HEART_ATRIUM_VS_VENTRICLE_DN                                                                                         | 0.09       |
| KEGG_HYPERTROPHIC_CARDIOMYOPATHY_HCM                                                                                      | 0.10       |
| WONG_MITOCHONDRIA_GENE_MODULE                                                                                             | 0.15       |
| REACTOME_PEROXISOMAL_LIPID_METABOLISM                                                                                     | 0.15       |
| KEGG_PARKINSONS_DISEASE                                                                                                   | 0.15       |
| REACTOME_MUSCLE_CONTRACTION                                                                                               | 0.16       |
| KEGG_PROPANOATE_METABOLISM                                                                                                | 0.17       |
| KEGG_VALINE_LEUCINE_AND_ISOLEUCINE_DEGRADATION                                                                            | 0.18       |
| REACTOME_TCA_CYCLE_AND_RESPIRATORY_ELECTRON_TRANSPORT                                                                     | 0.18       |
| KEGG_OXIDATIVE_PHOSPHORYLATION                                                                                            | 0.20       |
| REACTOME_RESPIRATORY_ELECTRON_TRANSPORT                                                                                   | 0.21       |
| KEGG_ALPHA_LINOLENIC_ACID_METABOLISM                                                                                      | 0.21       |
| MOOHA_MITOCHONDRIA                                                                                                        | 0.23       |
| LE_NEURONAL_DIFFERENTIATION_DN                                                                                            | 0.23       |
| KEGG_PYRUVATE_METABOLISM                                                                                                  | 0.23       |
| KEGG_LINOLEIC_ACID_METABOLISM                                                                                             | 0.23       |
| REACTOME_CITRIC_ACID_CYCLE_TCA_CYCLE                                                                                      | 0.24       |
| STEIN_ESRRA_TARGETS_UP                                                                                                    | 0.24       |
| REACTOME_RESPIRATORY_ELECTRON_TRANSPORT_ATP_SYNTHESIS_BY_CHEMIOSMOTIC_COUPLING_AND_HEAT_PRODUCTION_BY_UNCOUPLING_PROTEINS | 0.24       |
| KEGG_FATTY_ACID_METABOLISM                                                                                                | 0.24       |
|                                                                                                                           |            |
| <i>Upregulated in Exercised DKO v. Exercised WT:</i>                                                                      | <b>FDR</b> |
| KEGG_O_GLYCAN_BIOSYNTHESIS                                                                                                | 0.20       |
| LEE_LIVER_CANCER_MYC_DN                                                                                                   | 0.21       |
| WEINMANN_ADAPTATION_TO_HYPOXIA_UP                                                                                         | 0.22       |
| TONKS_TARGETS_OF_RUNX1_RUNX1T1_FUSION_GANULOCYTE_DN                                                                       | 0.23       |
|                                                                                                                           |            |
| <i>Downregulated in Exercised DKO v. Exercised WT:</i>                                                                    | <b>FDR</b> |
| BIOCARTA_PGC1A_PATHWAY                                                                                                    | 0.24       |

**Table S2 Transcripts increased by chronic GW1516 treatment *in vivo*. Related to Figure 5.**

|               |          |          |               |           |          |          |           |          |           |
|---------------|----------|----------|---------------|-----------|----------|----------|-----------|----------|-----------|
| 1110014N23Rik | Arl4d    | Cox8a    | Fabp3         | Herpud2   | Map3k6   | Pcgf3    | Ptp4a1    | Slc27a1  | Tmem120b  |
| 1110038D17Rik | Arl6ip1  | Cpsf4    | Fabp4         | Hgs       | Mapk1ip1 | Pck1     | Puf60     | Slc35e4  | Tmem43    |
| 1300010F03Rik | Armxcx4  | Cpt1b    | Fam13a        | Hmga2-ps1 | Mcam     | Pcnt     | Pxmp4     | Slc36a2  | Tmem50a   |
| 1700037H04Rik | Arrdc2   | Crat     | Fasn          | Hp        | Mcf2l    | Pcx      | Qsox1     | Slc43a1  | Tmtc1     |
| 2310001A20Rik | Arrdc3   | Creld1   | Fbp2          | Hp1bp3    | Mettl7a1 | Pde4b    | R3hdm1    | Slc7a10  | Tob2      |
| 2310028H24Rik | Art5     | Cryab    | Fbxo18        | Hr        | Mgll     | Pdia6    | Rab11b    | Slc7a2   | Tor2a     |
| 5730469M10Rik | Asb4     | Csad     | Fbxo21        | Hsd11b1   | Mgst1    | Pdk4     | Rab40b    | Slc7a8   | Traf1     |
| 6430571L13Rik | Atic     | Ctnna1   | Fbxo31        | Hsd17b12  | Mid1     | Pdlim3   | Rbp4      | Slc8a3   | Trf       |
| 8430408G22Rik | Atn1     | Ctnnbip1 | Fcgrt         | Hsd17b4   | Mif      | Pdpr     | Rcan1     | Slc9a1   | Trim28    |
| 9030624J02Rik | Atp13a3  | Ctss     | Fgfr1         | Hsp90ab1  | Mll2     | Pelp1    | Rela      | Smarca4  | Trim7     |
| 9430023L20Rik | Atxn10   | Cul9     | Fibin         | Hspb1     | Mlxip    | Pepd     | Reps1     | Smg6     | Trp53inp1 |
| 9530068E07Rik | B2m      | Cyb5     | Fkbp5         | Hspd1     | Mlycd    | Per1     | Retn      | Smtnl2   | Trp63     |
| A230051G13Rik | BC031353 | Cyp27a1  | Fmo1          | Hsph1     | Mmd      | Pex11a   | Retsat    | Snap29   | Tsc22d3   |
| C130074G19Rik | Bcl2l1   | Cyp2e1   | Fntb          | Htra3     | Mocs1    | Pex16    | Rhbf2     | Snape2   | Tspan14   |
| Abhd16a       | Bmyc     | Cyth2    | Furin         | Ifi2711   | Mon1a    | Pex6     | Rhob      | Snmp200  | Tspo      |
| Abtb1         | Bscl2    | D4Wsu53e | Fzd4          | Ifi2712a  | Mpdu1    | Pfkfb1   | Rhobtb1   | Snx10    | Tssc4     |
| Acaa2         | Bsdc1    | Dapk3    | Gab1          | Ifngr1    | Mstn     | Pfkfb3   | Rit1      | Sod3     | Tuba4a    |
| Acacb         | Btg2     | Dbi      | Gadd45a       | Igfbp4    | Mtap1s   | Pfkfb4   | Rnf167    | Sorbs2   | Tubb2c    |
| Acad1         | C3       | Dbnl     | Gadd45g       | Impdh1    | Mtap4    | Pgd      | Rnf31     | Sort1    | Tubb5     |
| Acads         | C4b      | Ddit4    | Galntl2       | Insg1     | Mxd4     | Pgls     | Rpl3      | Sparc    | Tusc5     |
| Acly          | Car3     | Ddr1     | Gamt          | Ipo13     | Mxra8    | Pik3ip1  | Rrp12     | Sra1     | Tut1      |
| Aco1          | Cat      | Ddx54    | Gatad2b       | Ipo4      | Mybbp1a  | Pik3r1   | Samhd1    | Srpr     | Ube2o     |
| Acot2         | Cblb     | Ddx56    | Gatsl2        | Irgq      | Mybpb    | Pik3r2   | Scamp4    | Srrm2    | Ube4a     |
| Acp5          | Ccdc80   | Dgat1    | Gclm          | Jak1      | Myf6     | Pim3     | Scand1    | Stand3   | Ubr4      |
| Acs1l         | Ccdc86   | Dgat2    | Glul          | Jun       | Myh14    | Plbd1    | Scarb1    | Stk11ip  | Uck1      |
| Acs13         | Ccng2    | Dgkd     | Gm9766        | Kctd20    | Myo18b   | Plcd4    | Scd1      | Stom     | Ucp2      |
| Acss2         | Ccr12    | Diap1    | Golgb1        | Kdm6b     | Myo1c    | Plec     | Sec24b    | Sugg1    | Ucp3      |
| Actc1         | Cdc14a   | Dnajb12  | Gpm           | Klf10     | Naca     | Plekhh3  | Sec31a    | Sult1a1  | Usp2      |
| Acvr1b        | Cdk2ap2  | Dpep1    | Gprc5c        | Klh138    | Nadk     | Plin1    | Sepp1     | Supt3h   | Vars      |
| Adh1          | Cdk5rap1 | Dpp3     | Gpt2          | Kptn      | Napb     | Plin2    | Serf1     | Svil     | Wasf2     |
| Adig          | Cdo1     | Dupd1    | Gpx1          | Lars2     | Net1     | Plin4    | Serinc2   | Synpo21  | Wbp7      |
| Adipoq        | Cebpa    | Dync1h1  | Grb10         | Ldhh      | Nfkbia   | Plin5    | Serpina3n | Tacc2    | Wdr44     |
| Adrb2         | Cebpb    | Dyrk1b   | Grina         | Lgals3bp  | Nkain1   | Pmepa1   | Sesn1     | Taldo1   | Wdr46     |
| Agpat2        | Cebpd    | Eci2     | Grif1         | Lgals4    | No13     | Pnpla2   | Setd1a    | Tars2    | Wdr8      |
| Agpat3        | Ces1d    | Eda2r    | Gm            | Lipe      | No16     | Pnpla7   | Sf1       | Tbcd20   | Xdh       |
| A1837181      | Cfd      | Eef1a1   | Gse1          | Lmo7      | Npc2     | Pnrc1    | Sgk1      | Tbcd14   | Xpc       |
| Aifm2         | Chac1    | Egln3    | Gsk3b         | Lmtk2     | Npdc1    | Podn     | Sh2b3     | Tcap     | Yars      |
| Akap13        | Chd4     | Ehd4     | Gstp2         | Lpcat3    | Nr1h3    | Polr3e   | Sh3glb2   | Tcfcp2l1 | Ypel3     |
| Alad          | Chpf2    | Eif3d    | Gstt1         | Lpl       | Nudt18   | Por      | Sh3pxd2a  | Tcfef    | Ywhab     |
| Aldh2         | Chst1    | Eif4ebp1 | Gstt2         | Lrg1      | Numa1    | Pparg    | Shisa2    | Tcn2     | Ywhag     |
| Amot          | Cidec    | Elmod3   | Gstz1         | Lrp1      | Nup93    | Ppp1r12b | Sik1      | Tcp112   | Zbtb16    |
| Anape2        | Cish     | Eml2     | H19           | Lrrc30    | Obsl1    | Ppp1r1a  | Sik2      | Teta     | Zbtb7b    |
| Angptl4       | Cited2   | Ephx2    | H2-Ab1        | Lrrc41    | Odc1     | Ppp2r1b  | Sik3      | Tecpr1   | Zc3h4     |
| Ankrd11       | Clec10a  | Erec5    | H2-D1         | Lrrc58    | ORF19    | Prkag3   | Slc12a2   | Tecpr2   | Zfp36     |
| Ankrd9        | Clip1    | Errfi1   | H2-Eb1        | Lrrc8a    | Ormdl3   | Prkar2b  | Slc1a5    | Tenc1    | Zfp503    |
| Aoc3          | Cnm3     | Esyt1    | H2-K1         | Lztr1     | Osbpl11  | Prpf3    | Slc25a1   | Tgfbr2   | Zfp579    |
| Aox1          | Cobra1   | Etfb     | H2afx         | Mafb      | Otud5    | Prpf40b  | Slc25a20  | Thrsp    | Zfp598    |
| Ap1p2         | Colla1   | Exoc7    | H6pd          | Maged1    | Paf1     | Prpf8    | Slc25a22  | Tirap    | Zfp652    |
| Apoc1         | Col3a1   | Exosc5   | Hadh          | Maged2    | Pak2     | Prrc1    | Slc25a23  | Tkt      | Zfp703    |
| Apoe          | Coro1b   | Eya4     | Hba-a1,Hba-a2 | Malat1    | Pallid   | Prrc2a   | Slc25a25  | Tle4     | Zfp771    |
| Arid1a        | Cox6a1   | Ezh1     | Herpud1       | Mamstr    | Pank3    | Ptms     | Slc25a42  | Tmem120a | Zfyve1    |
|               |          |          |               |           |          |          |           |          | Znfx1     |

**Table S3 Primer sequences for qPCR analysis. Related to Figures 3, 4, and 5.**

| <b>Gene</b>          | <b>Forward Primer (5'-3')</b>     | <b>Reverse Primer (5'-3')</b>   |
|----------------------|-----------------------------------|---------------------------------|
| <i>Acadl</i>         | CTC CGC CCG ATG TTC TCA TTC       | CTC TAC TCA CTT CTC CAG CTT TC  |
| <i>Acs14</i>         | CAG AAA ACT TGA GCG TTC CTC CAA G | GCA CAT GAG CCA AAG GTA AGT AGC |
| <i>Adipoq</i>        | TGT TCC TCT TAA TCC TGC CCA       | CCA ACC TGC ACA AGT TCC CTT     |
| <i>Cd36</i>          | GAT TAA TGG CAC AGA CGC AGC C     | GAT GCA AAG GCA TTG GCT GGA AG  |
| <i>Cfd</i>           | CAT GCT CGG CCC TAC ATG G         | CAC AGA GTC GTC ATC CGT CAC     |
| <i>Cox1</i>          | TGC TAG CCG CAG GCA TTA CT        | CGG GAT CAA AGA AAG TTG TGT TT  |
| <i>Cpt1b</i>         | CAC CGG TAC TTG GAT TCT GTG C     | GTA GAC ATA TTC TTC CCA CCA GTC |
| <i>Fabp3</i>         | CAC AGA GAT CAA CTT TCA GCT GGG   | CCA TGA GTG AGA GTC AGG ATG AG  |
| <i>Fasn</i>          | GGA GGT GGT GAT AGC CGG TAT       | TGG GTA ATC CAT AGA GCC CAG     |
| <i>Hprt</i>          | TGC TCG AGA TGT CAT GAA GG        | TAT GTC CCC CGT TGA CTG AT      |
| <i>Hsl</i>           | CTT CCA GTT CAC ACC TGC CAT C     | CCA CGC AAC TCT GGG TCT ATG     |
| <i>Lpl</i>           | CAT GGA TGG ACG GTA ACG GGA ATG   | CCC TAA GAG GTG GAC GTT GTC TAG |
| <i>Mlc1</i>          | GCA ACA GGA GGA CTT CAA GGA GGC   | ATT GGT GCC CAG AGC CCG GA      |
| <i>Mlycd</i>         | GCA CGT CCG GGA AAT GAA CG        | GAG AAG AAG TAA CAT CTC CGG TAG |
| <i>Myf5</i>          | AGC TGC TGA GGG AAC AGG TGG A     | ATT CAG GCA TGC CGT CAG AGC A   |
| <i>Myh1</i>          | TCT GCA GAC GGA GTC AGG T         | TTG AGT GAA TGC CTG TTT GC      |
| <i>Myh2</i>          | GTC AAA GGA GGA GGA ACA GCA GC    | GTT GAG TGA ATG CTT GCT TCC CC  |
| <i>Myh4</i>          | TGG CCG AGC AAG AGC TAC           | TTG ATG AGG CTG GTG TTC TG      |
| <i>Myh7</i>          | CCA AGG GCC TGA ATG AGG AG        | GCA AAG GCT CCA GGT CTG AG      |
| <i>MyoD</i>          | TGG CAT CCG GTG CAC TGC AG        | CCC TCC AGA AGG GTA GCA CGC T   |
| <i>Myogenin</i>      | GTC CCA ACC CAG GAG ATC ATT       | AGT TGG GCA TGG TTT CGT CT      |
| <i>Pax7</i>          | TCT CCA AGA TTC TGT GCC GAT       | CGG GGT TCT CTC TCT TAT ACTC C  |
| <i>Pck1</i>          | CTG CAT AAC GGT CTG GAC TTC       | CAG CAA CTG CCC GTA CTC C       |
| <i>Pdk4</i>          | AGG GAG GTC GAG CTG TTC TC        | GGA GTG TTC ACT AAG CGG TCA     |
| <i>Pgc1a (total)</i> | AAC CAG TAC AAC AAT GAG CCT G     | AAT GAG GGC AAT CCG TCT TCA     |
| <i>Pgc1a-a1</i>      | GGA CAT GTG CAG CCA AGA CTC T     | CAC TTC AAT CCA CCC AGA AAG CT  |
| <i>Pgc1a-a2</i>      | CCA CCA GAA TGA GTG ACA TGG A     | GTT CAG CAA GAT CTG GGC AAA     |
| <i>Pgc1a-a3</i>      | AAG TGA GTA ACC GGA GGC ATT C     | TTC AGG AAG ATC TGG GCA AAG A   |
| <i>Pgc1a-b</i>       | GAC ATG GAT GTT GGG ATT GTC A     | ACC AAC CAG AGC AGC ACA TTT     |
| <i>Pgc1a-c</i>       | AGT GAC ATG GAT GTT GGG ATT G     | GAA TGC CTC CGG TTA CTC ACT T   |
| <i>Retn</i>          | AAG AAC CTT TCA TTT CCC CTC CT    | GTC CAG CAA TTT AAG CCA ATG TT  |
| <i>RNaseP</i>        | GCC TAC ACT GGA GTC GTG CTA CT    | CTG ACC ACA CGA GCT GGT AGA A   |
| <i>Scd1</i>          | TTC TTG CGA TAC ACT CTG GTG C     | CGG GAT TGA ATG TTC TTG TCG T   |
| <i>Slc27a1</i>       | CGC TTT CTG CGT ATC GTC TG        | GAT GCA CGG GAT CGT GTC T       |
| <i>Tkt</i>           | ATG GAA GGT TAC CAT AAG CCA GA    | TGC AGC ATG ATG TGG GGT G       |
| <i>Trf</i>           | TGG GGG TTG GGT GTA CGA T         | AGC GTA GTA GTA GGT CTG TGG     |
| <i>Ucp3</i>          | CTG CAC CGC CAG ATG AGT TT        | ATC ATG GCT TGA AAT CGG ACC     |
